# Supplementary material
Source: Springer Nature journal article supplement (https://www.springermedizin.de/resource/supplementary/13002_2010_219_MOESM1_ESM.pdf/9627408)

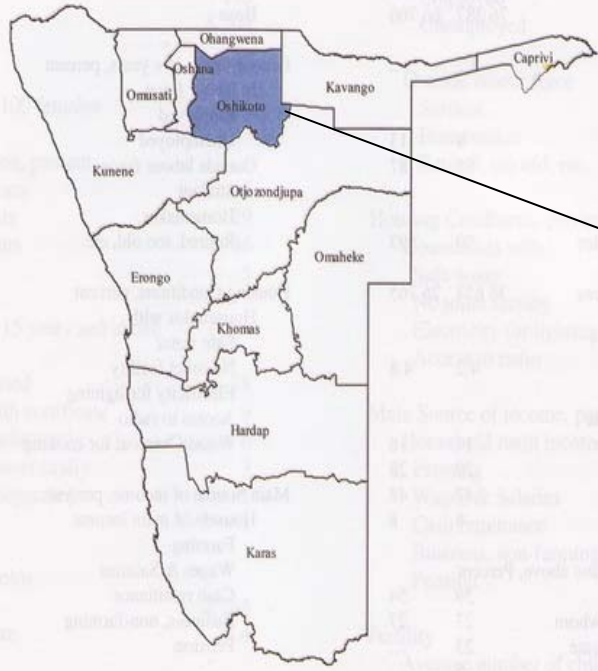

## Oshikoto Region

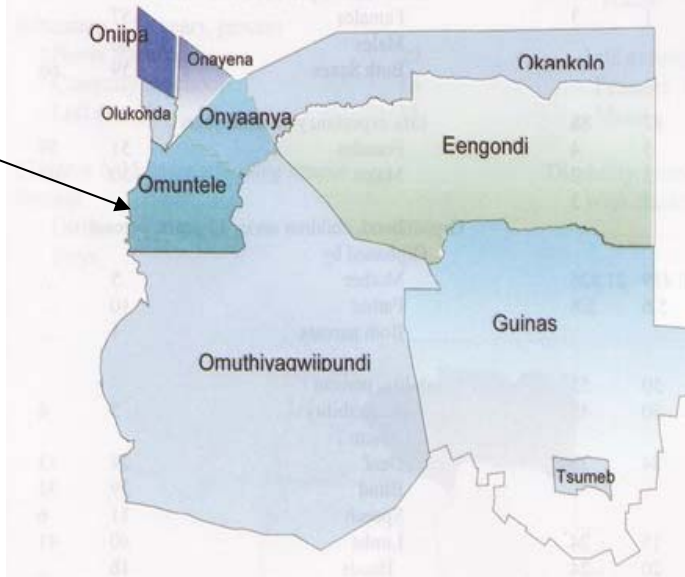

Supplement: MOESM1 [file 9627408]
